# Supplementary material for: The Broad Host Range and Genetic Diversity of Mammalian and Avian Astroviruses
Source: MDPI journal article supplement (doi:10.3390/v9050102), 2017-05-10
Supplement: s1 [file s1]

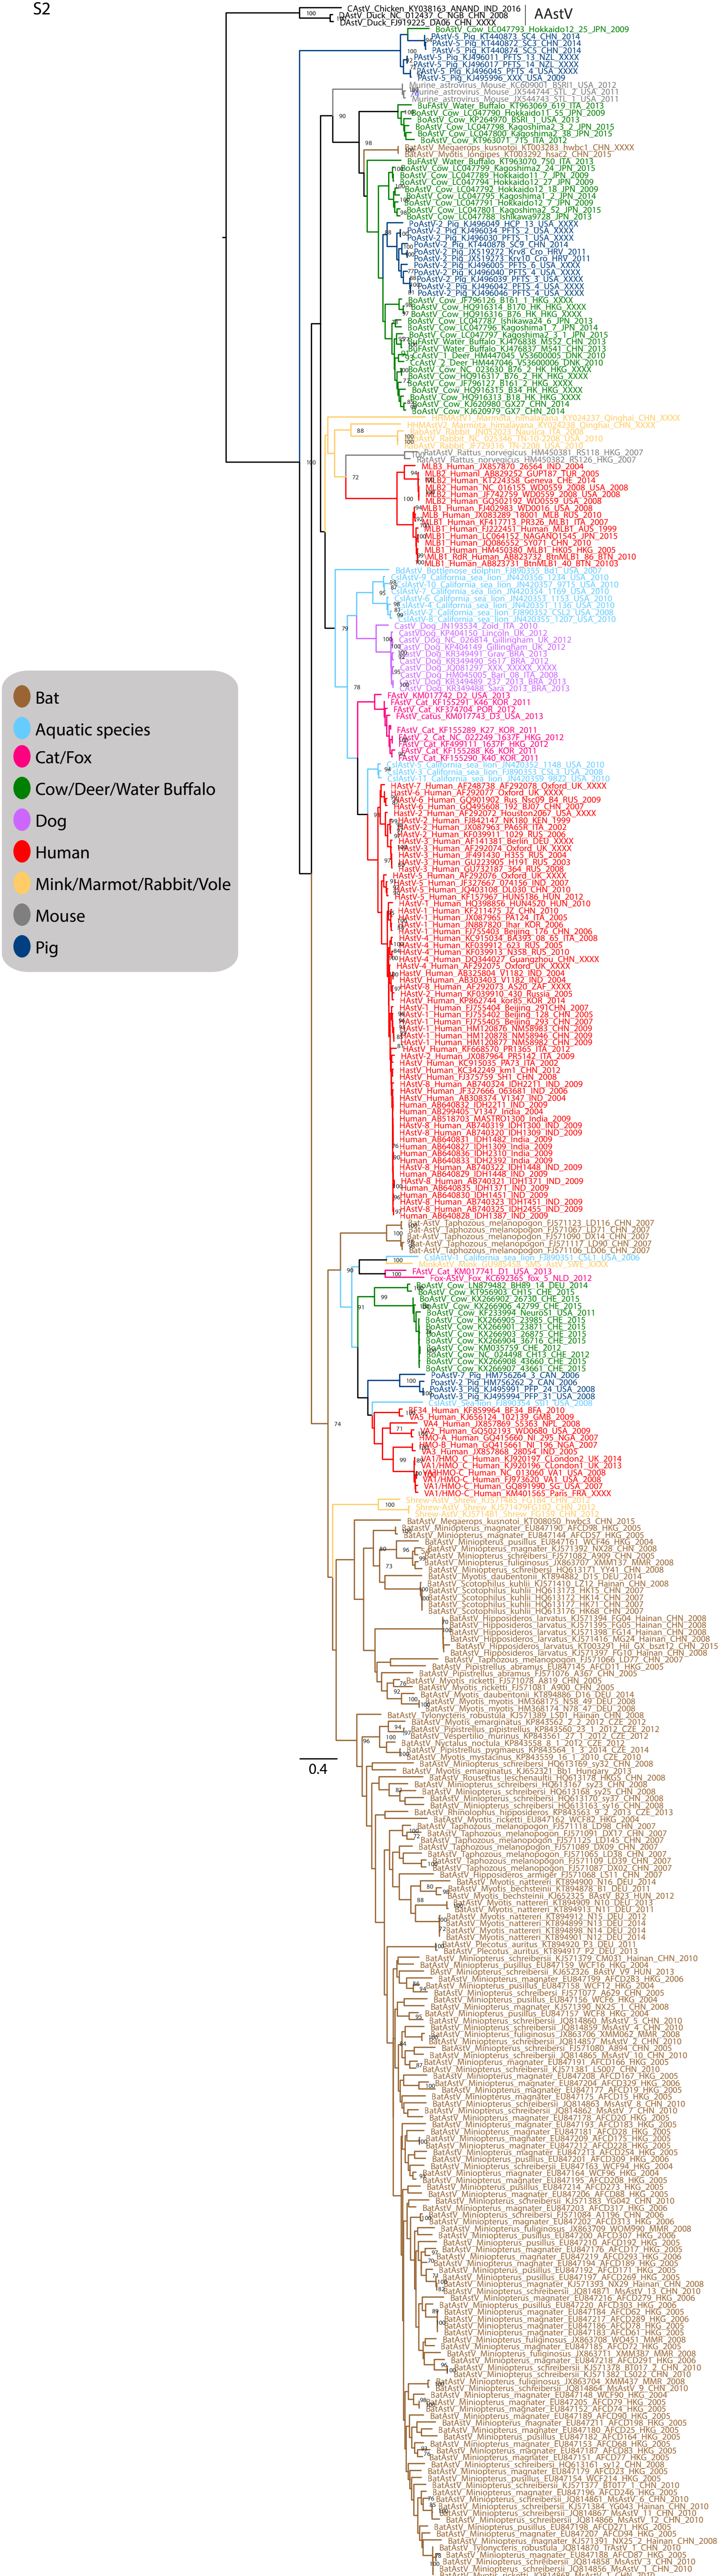

S2: Maximum-likelihood phylogenetic tree of MASTV RdRp  
Trees were generated using the maximum-likelihood method with 1,000 bootstrap replicates and nodes with bootstrap support values ≥70 are shown. Proposed species yet to be recognized are designated with a ^ symbol. Strains are colored by host and are indicated by the Host\_GenBank Accession number\_Strain\_Country\_of isolation\_Year of isolation.
