# Supplementary material for: The Broad Host Range and Genetic Diversity of Mammalian and Avian Astroviruses
Source: MDPI journal article supplement (doi:10.3390/v9050102), 2017-05-10
Supplement: s1 [file s1]

0.3
