# Supplementary figures and images for: The Broad Host Range and Genetic Diversity of Mammalian and Avian Astroviruses
Source: MDPI journal article supplement (doi:10.3390/v9050102), 2017-05-10

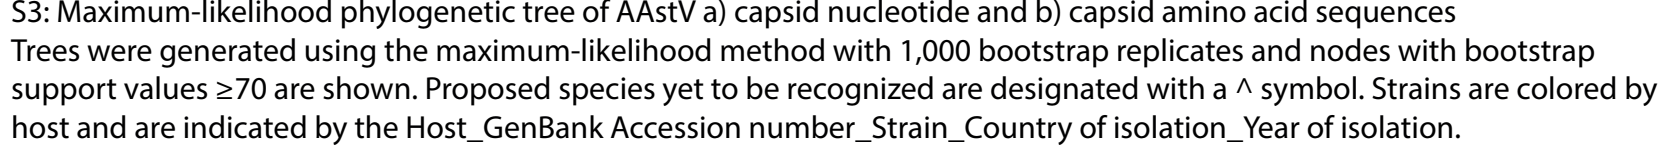

Supplement: s1 [file s1]
